# Supplementary material for: Glycerol Esterification for Triacetin Production using Fe3O4@SiO2@PO43- as Heterogeneous Magnetic Catalyst
Source: Research Square preprint supplement (doi:10.21203/rs.3.rs-879616/v1), 2021-10-19
Supplement: Supplementary file 1 [file 72cd37af7a2ebb86592e2ec9.docx]

**Supplementary Information (S)**
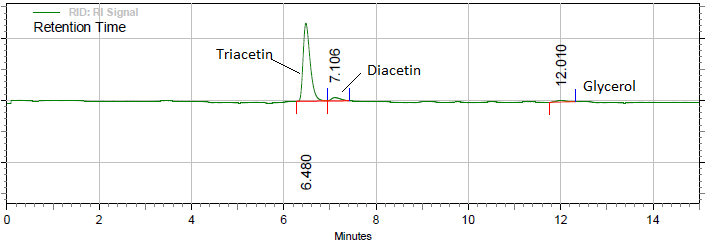


**Fig. S1.** HPLC chromatogram of triacetin produced during glycerol esterification in presence of Fe3O4@SiO2@PO43-.

**
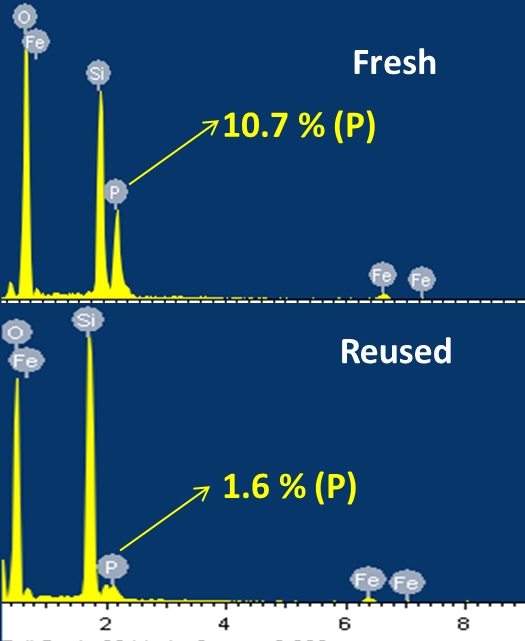
**

**Fig. S2.** Comparison of EDX spectra of fresh and reused catalyst.
